# Supplementary material for: Microbiota associated with urban forests
Source: PeerJ. 2024 Feb 29;12:e16987. doi: 10.7717/peerj.16987 (PMC10913776; doi:10.7717/peerj.16987)
Supplement: Supplemental Information 1 [file peerj-12-16987-s001.xlsx]

## Sheet: Sheet2
	SOM（g/kg）	TN（g/kg）	TP（g/kg）	AK（g/kg）	AP（mg/kg）	pH
ZL-1	10.79	0.81	0.89	0.38	39.61	7.89
ZL-2	8.84	0.75	0.92	0.32	35.14	8.63
ZL-3	6.25	0.68	1.02	0.34	38.16	8.27
SSL-1	11.77	0.82	0.68	0.19	22.47	8.16
SSL-2	14.24	0.79	0.58	0.22	25.14	8.15
SSL-3	13.67	0.82	0.92	0.25	23.67	8.02
SZY-1	5.38	0.42	0.84	0.21	15.34	8.59
SZY-2	4.24	0.38	0.81	0.23	16.28	8.99
SZY-3	2.84	0.37	0.72	0.21	16.34	9.15
ZKG-1	5.35	0.62	0.89	0.35	17.98	7.06
ZKG-2	6.24	0.98	0.78	0.38	19.34	7.17
ZKG-3	5.38	0.57	0.63	0.34	22.58	7.18
SBL-1	4.32	0.82	0.68	0.38	23.67	5.96
SBL-2	3.47	0.56	0.75	0.41	24.91	6.28
SBL-3	5.47	0.42	0.51	0.5	25.87	6.55
ZKQ-1	19.18	1.08	0.74	0.33	40.15	6.5
ZKQ-2	16.02	0.94	0.98	0.29	42.35	6.78
ZKQ-3	17.37	1.28	0.99	0.28	36.18	6.76
